# Supplementary material for: Waste-biomass-derived activated carbon supported Co–Cu–P nanocatalysts for hydrolytic dehydrogenation of ammonia borane
Source: Royal Society of Chemistry journal article supplement (doi:10.1039/d3ra00247k), 2023-01-01
Supplement: d3ra00247k1.pdf [file d3ra00247k1.pdf]

Electronic Supplementary Information

**Waste-biomass-derived activated carbon supported Co–Cu–P nanocatalysts for hydrolytic dehydrogenation of ammonia borane**

Lei Wei,\* Yanhong Lu, Ruixuan Lu, Yuxin Cui

College of Chemistry and Materials Science, Langfang Normal University, Langfang 065000, P. R. China

\*Corresponding author. E-mail: [weilei@lfnu.edu.cn](mailto:weilei@lfnu.edu.cn)

Table S1 ICP analysis results of the prepared catalysts

| Sample                                   | Co content (wt%) | Cu content (wt%) | P content (wt%) |
|------------------------------------------|------------------|------------------|-----------------|
| CoP/AC                                   | 8.92             | 0                | 2.26            |
| Co <sub>0.8</sub> Cu <sub>0.2</sub> P/AC | 7.23             | 1.75             | 2.13            |
| Co <sub>0.6</sub> Cu <sub>0.4</sub> P/AC | 5.44             | 3.40             | 2.24            |
| Co <sub>0.4</sub> Cu <sub>0.6</sub> P/AC | 3.47             | 5.31             | 2.21            |
| Co <sub>0.2</sub> Cu <sub>0.8</sub> P/AC | 1.66             | 7.34             | 2.09            |
| CuP/AC                                   | 0                | 8.83             | 1.92            |

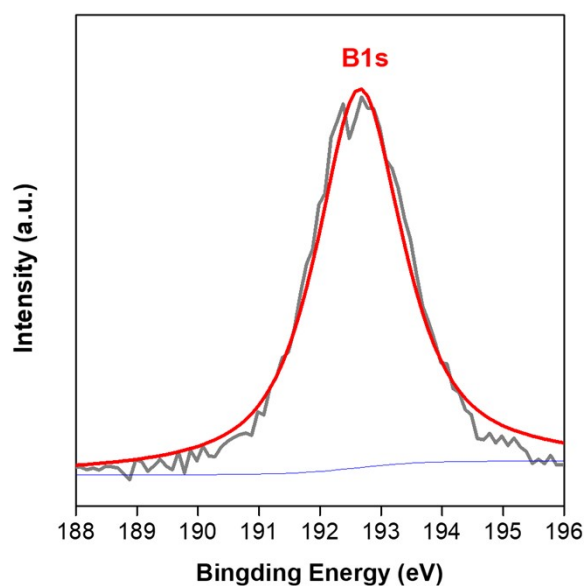

Fig. S1 High-resolution XPS spectrum of B 1s of the reused catalyst.
